# Supplementary material
Source: PubMed Central journal article supplement (PMC6402984)

## **Supporting Information for:**

### **NMR Evidence for Dynamic Stacking of the Expected Branch Point Adenosine in Duplexes containing Pseudouridine-Modified or Unmodified U2 snRNA Sites**

Scott D. Kennedy, William J. Bauer, Wenhua Wang, and Clara L. Kielkopf

**Table S1.**

NOE distances obtained for pseudouridylated or unmodified duplexes.

| <b>H6/8-H1'</b>      | <b>NOE-derived Distance</b> |          |
|----------------------|-----------------------------|----------|
|                      | <b>Ψ</b>                    | <b>U</b> |
| 1H8-H1'              | 3.6                         | 3.6      |
| 2H6-H1'              | 3.5                         | 3.6      |
| 3H6-H1'              |                             |          |
| 4H8-H1'              | 4.0                         | 3.9      |
| 5H6-H1'              |                             | 3.8      |
| 6H6-H1'              | 3.9                         |          |
| 9H6-H1'              | 3.5                         | 3.4      |
| 10H8-H1'             | 3.7                         | 3.7      |
| 33H6-H1'             | 3.4                         | 3.5      |
| 34H8-H1'             | 3.8                         | 3.7      |
| 36H8-H1'             | 4.1                         | 4.0      |
| 37H8-H1'             | 4.0                         | 3.5      |
| 38H6-H1'             | 3.6                         | 3.6      |
| 40H8-H1'             | 3.7                         | 3.9      |
| 41H6-H1'             | 3.5                         | 3.6      |
| <b>H6/8-(n-1)H2'</b> |                             |          |
| 2H6-1H2'             | 2.7                         | 2.7      |
| 4H8-3H2'             | 2.5                         | 2.4      |
| 5H6-4H2'             | 2.6                         | 2.5      |
| 6H6-5H2'             | 2.5                         | 2.5      |
| 10H8-9H2'            |                             |          |
| 34H8-33H2'           | 2.4                         | 2.4      |
| 37H8-36H2'           | 2.6                         | 2.6      |
| 38H6-37H2'           | 2.3                         | 2.3      |
| 39H8-38H2'           | 2.4                         | 2.4      |
| 40H8-39H2'           | 2.4                         | 2.5      |
| <b>H2-H1'</b>        |                             |          |
| 39H2-4H1'            | 3.7                         | 3.7      |
| 39H2-40H1'           | 3.4                         | 3.5      |
| 4H2-39H1'            | 3.6                         | 3.6      |
| 4H2-5H1'             | 3.3                         | 3.4      |

**Table S1 (continued).**

**Loop**

|             |     |     |
|-------------|-----|-----|
| 8H2-36H1'   | 3.6 | 3.5 |
| 8H2-9H1'    | 3.6 | 3.4 |
| 8H8-6H2'    | 4.1 | 4.6 |
| 8H8-6H1'    | 4.5 | 4.6 |
| 8H8-7H1'    | 4.8 | 5.2 |
| 8H8-7H2'    | >4  | >4  |
| 7H8-6H2'    | 3.4 | 3.3 |
| 36H2-8H1'   | 4.6 | 3.9 |
| 36H2-7H1'   | 5.4 | 4.3 |
| 9H6-8H2'    | 2.6 | 2.5 |
| 35H6-34H2'  | 2.6 | 2.7 |
| 36H8-35H2'  | 2.6 | 2.5 |
| 35H6-H1'    | 3.6 | 3.6 |
| 8H8-H1'     | 3.8 | 3.9 |
| 7H8-7H1'    | 3.0 | 2.8 |
| 36H8-35H3'  | 3.1 |     |
| 36H1'-35H2' | 4.7 |     |

**H1'-(n-1)H2'**

|             |     |  |
|-------------|-----|--|
| 5H1-4H2'    | 4.1 |  |
| 10H1'-9H2'  | 4.1 |  |
| 34H1'-33H2' | 4.5 |  |
| 37H1'-36H2' | 4.6 |  |
| 38H1'-37H2' | 4.9 |  |
| 40H1'-39H2' | 3.9 |  |

**Table S2.** Comparison of pseudouridine-containing ( $\Psi$ ) and unmodified (U) duplexes. Difference is given and shown in bold if greater than 0.05 ppm. Branch site and neighboring nucleotides are shaded. "NA" is not applicable; "-" is not assigned.

**(a)** Chemical shifts of non-exchangeable protons of samples at 25 °C in 100% D<sub>2</sub>O (10 mM K<sub>2</sub>PO<sub>4</sub>, 0.25 mM EDTA pH 6.8).

| Residue                      | H6/H8 |        |             | H5/H2 |        |             | H1'  |        |             | H2'  |        |             | H3'  |        |             | H4'  |        |             | H5'' |        |             | H5'  |        |             |
|------------------------------|-------|--------|-------------|-------|--------|-------------|------|--------|-------------|------|--------|-------------|------|--------|-------------|------|--------|-------------|------|--------|-------------|------|--------|-------------|
|                              | U     | $\Psi$ | U- $\Psi$   | U     | $\Psi$ | U- $\Psi$   | U    | $\Psi$ | U- $\Psi$   | U    | $\Psi$ | U- $\Psi$   | U    | $\Psi$ | U- $\Psi$   | U    | $\Psi$ | U- $\Psi$   | U    | $\Psi$ | U- $\Psi$   | U    | $\Psi$ | U- $\Psi$   |
| <b>G1</b>                    | 8.14  | 8.13   | 0.01        | NA    | NA     | NA          | 5.89 | 5.89   | 0.01        | 4.82 | 4.82   | 0.00        | 4.57 | 4.56   | 0.01        | 4.45 | 4.44   | 0.01        | 3.96 | 3.96   | 0.00        | 4.12 | 4.12   | 0.01        |
| <b>C2</b>                    | 7.85  | 7.83   | 0.02        | 5.26  | 5.26   | 0.00        | 5.58 | 5.58   | 0.00        | 4.45 | 4.45   | 0.00        | 4.54 | 4.53   | 0.01        | 4.49 | 4.49   | 0.00        | 4.17 | 4.17   | 0.00        | -    | 4.59   | -           |
| <b>U3</b>                    | 7.90  | 7.89   | 0.01        | 5.51  | 5.50   | 0.01        | 5.53 | 5.53   | 0.00        | 4.60 | 4.60   | 0.01        | 4.64 | 4.63   | 0.01        | 4.46 | 4.46   | 0.00        | 4.15 | 4.15   | 0.00        | -    | -      | -           |
| <b>A4</b>                    | 8.17  | 8.17   | 0.00        | 7.04  | 7.05   | 0.01        | 5.97 | 5.97   | 0.00        | 4.56 | 4.56   | 0.00        | 4.65 | 4.65   | 0.00        | 4.53 | 4.52   | 0.00        | 4.19 | 4.19   | 0.00        | -    | 4.57   | -           |
| <b>C5</b>                    | 7.43  | 7.43   | 0.00        | 5.23  | 5.24   | 0.01        | 5.27 | 5.27   | 0.00        | 4.05 | 4.04   | 0.01        | 4.31 | 4.32   | 0.00        | 4.36 | 4.35   | 0.01        | 4.03 | 4.03   | 0.00        | -    | 4.48   | -           |
| <b>U6</b>                    | 7.64  | 7.65   | 0.00        | 5.31  | 5.31   | 0.01        | 5.76 | 5.78   | 0.02        | 4.28 | 4.28   | 0.01        | 4.60 | 4.62   | 0.02        | 4.24 | 4.26   | 0.02        | 4.01 | 4.01   | 0.00        | 4.27 | 4.28   | 0.01        |
| <b>G7</b>                    | 7.89  | 7.92   | 0.03        | NA    | NA     | NA          | 5.84 | 5.89   | <b>0.05</b> | 4.69 | 4.75   | <b>0.06</b> | 5.02 | 5.03   | 0.01        | 4.48 | 4.51   | 0.03        | 4.19 | 4.20   | 0.01        | 4.33 | 4.33   | 0.00        |
| <b>A8</b>                    | 8.29  | 8.33   | 0.03        | 7.62  | 7.64   | 0.01        | 5.97 | 6.02   | <b>0.05</b> | 4.68 | 4.71   | 0.03        | 4.62 | 4.64   | 0.02        | 4.58 | 4.59   | 0.01        | 4.42 | 4.42   | 0.01        | 4.32 | 4.33   | 0.00        |
| <b>C9</b>                    | 7.47  | 7.47   | 0.00        | 5.14  | 5.08   | <b>0.06</b> | 5.49 | 5.48   | 0.01        | 4.38 | 4.37   | 0.00        | 4.42 | 4.43   | 0.00        | 4.43 | 4.45   | 0.03        | 4.15 | 4.15   | 0.01        | -    | -      | -           |
| <b>G10</b>                   | 7.49  | 7.49   | 0.00        | NA    | NA     | NA          | 5.69 | 5.70   | 0.01        | 4.50 | 4.49   | 0.01        | 4.54 | 4.55   | 0.00        | 4.41 | 4.41   | 0.00        | 4.10 | 4.10   | 0.00        | 4.43 | -      | -           |
| <b>A11</b>                   | 7.87  | 7.87   | 0.00        | 7.86  | 7.86   | 0.00        | 5.97 | 5.96   | 0.00        | 4.13 | 4.12   | 0.00        | 4.28 | 4.28   | 0.01        | 4.26 | 4.26   | 0.00        | 4.06 | 4.06   | 0.01        | -    | 4.42   | -           |
| <b>C33</b>                   | 8.08  | 8.09   | 0.01        | 5.99  | 5.98   | 0.01        | 5.65 | 5.63   | 0.01        | 4.67 | 4.68   | 0.01        | 4.53 | 4.52   | 0.01        | 4.38 | 4.39   | 0.01        | 3.96 | 3.96   | 0.00        | 4.08 | 4.09   | 0.01        |
| <b>G34</b>                   | 7.67  | 7.72   | <b>0.06</b> | NA    | NA     | NA          | 5.75 | 5.78   | 0.02        | 4.57 | 4.75   | <b>0.18</b> | 4.57 | 4.63   | <b>0.06</b> | 4.50 | 4.49   | 0.01        | 4.18 | 4.17   | 0.01        | -    | -      | -           |
| <b>U/<math>\Psi</math>35</b> | 7.56  | 7.02   | <b>0.54</b> | 5.22  | NA     | NA          | 5.51 | 4.64   | <b>0.87</b> | 4.47 | 4.40   | <b>0.07</b> | 4.53 | 4.48   | 0.05        | 4.44 | 4.23   | <b>0.21</b> | 4.13 | 4.04   | <b>0.09</b> | 4.52 | 4.41   | <b>0.11</b> |
| <b>A36</b>                   | 8.22  | 8.14   | <b>0.08</b> | 7.03  | 6.97   | <b>0.06</b> | 5.89 | 5.86   | 0.03        | 4.74 | 4.71   | 0.03        | 4.69 | 4.70   | 0.00        | 4.50 | 4.48   | 0.02        | 4.20 | 4.16   | 0.04        | -    | -      | -           |
| <b>G37</b>                   | 7.17  | 7.14   | 0.04        | NA    | NA     | NA          | 5.34 | 5.37   | 0.03        | 4.30 | 4.30   | 0.00        | 4.32 | 4.32   | 0.00        | 4.42 | 4.42   | 0.01        | 4.07 | 4.05   | 0.03        | -    | 4.39   | -           |
| <b>U38</b>                   | 7.68  | 7.66   | 0.02        | 5.07  | 5.06   | 0.01        | 5.48 | 5.48   | 0.00        | 4.45 | 4.46   | 0.00        | 4.57 | 4.56   | 0.01        | 4.39 | 4.39   | 0.00        | 4.07 | 4.06   | 0.00        | 4.52 | 4.52   | 0.00        |
| <b>A39</b>                   | 8.07  | 8.07   | 0.01        | 6.79  | 6.79   | 0.00        | 5.98 | 5.98   | 0.00        | 4.62 | 4.62   | 0.00        | 4.73 | 4.72   | 0.01        | 4.51 | 4.51   | 0.00        | 4.16 | 4.16   | 0.00        | -    | -      | -           |
| <b>G40</b>                   | 7.30  | 7.29   | 0.01        | NA    | NA     | NA          | 5.59 | 5.58   | 0.00        | 4.38 | 4.38   | 0.00        | 4.39 | 4.38   | 0.00        | 4.43 | 4.43   | 0.00        | 4.09 | 4.08   | 0.00        | 4.46 | -      | -           |
| <b>C41</b>                   | 7.37  | 7.37   | 0.00        | 5.09  | 5.09   | 0.01        | 5.42 | 5.43   | 0.00        | 4.36 | 4.35   | 0.01        | 4.36 | 4.35   | 0.01        | 4.38 | -      | -           | 4.03 | 4.03   | 0.00        | 4.48 | 4.48   | 0.01        |
| <b>A42</b>                   | 8.03  | 8.03   | 0.00        | 7.45  | 7.46   | 0.01        | 6.01 | 6.00   | 0.00        | 4.05 | 4.05   | 0.00        | 4.30 | 4.29   | 0.00        | 4.23 | 4.23   | 0.00        | 4.03 | 4.04   | 0.00        | -    | 4.41   | -           |

**Table S2 (continued).**

(b) Chemical shifts of exchangeable protons of samples at 0 °C and <sup>31</sup>P at 25 °C. <sup>31</sup>P shifts are relative to trimethylphosphate. Amino 1 is GH21, CH42, or AH62. Amino 2 is GH22, CH41, or AH61.

| Residue        | H1/H3 |       |             | Amino 1 |      |      | Amino 2 |      |             | P     |       |             |
|----------------|-------|-------|-------------|---------|------|------|---------|------|-------------|-------|-------|-------------|
|                | U     | Ψ     | U-Ψ         | U       | Ψ    | U-Ψ  | U       | Ψ    | U-Ψ         | U     | Ψ     | U-Ψ         |
| <b>G1</b>      | 12.71 | 12.71 | 0.00        | 6.33    | 6.35 | 0.02 | 8.40    | 8.41 | 0.01        | NA    | NA    | NA          |
| <b>C2</b>      | NA    | NA    | NA          | 6.86    | 6.87 | 0.01 | 8.62    | 8.62 | 0.00        | -4.24 | -4.22 | 0.02        |
| <b>U3</b>      | 13.29 | 13.30 | 0.01        | NA      | NA   | NA   | NA      | NA   | NA          | -3.94 | -3.94 | 0.01        |
| <b>A4</b>      | NA    | NA    | NA          | 6.48    | 6.50 | 0.01 | 7.87    | 7.90 | 0.02        | -3.84 | -3.83 | 0.01        |
| <b>C5</b>      | NA    | NA    | NA          | 7.13    | 7.15 | 0.02 | 8.08    | 8.10 | 0.03        | -4.07 | -4.06 | 0.01        |
| <b>U6</b>      | 13.33 | 13.57 | <b>0.24</b> | NA      | NA   | NA   | NA      | NA   | NA          | -4.39 | -4.39 | 0.01        |
| <b>G7</b>      | 10.49 | 10.67 | <b>0.18</b> | -       | -    | -    | -       | -    | -           | -3.25 | -3.28 | 0.02        |
| <b>A8</b>      | NA    | NA    | NA          | -       | -    | -    | -       | -    | -           | -3.60 | -3.50 | <b>0.10</b> |
| <b>C9</b>      | NA    | NA    | NA          | 6.69    | 6.65 | 0.04 | 8.08    | 8.00 | <b>0.07</b> | -3.88 | -3.92 | 0.04        |
| <b>G10</b>     | 12.35 | 12.33 | 0.02        | -       | -    | -    | -       | -    | -           | -3.76 | -3.79 | 0.02        |
| <b>A11</b>     | NA    | NA    | NA          | -       | -    | -    | -       | -    | -           | -3.85 | -3.85 | 0.00        |
|                |       |       |             | 0.00    |      |      | 0.00    | 0.00 |             |       |       |             |
| <b>C33</b>     | NA    | NA    | NA          | 6.87    | 6.90 | 0.02 | 8.38    | 8.42 | 0.03        | NA    | NA    | NA          |
| <b>G34</b>     | 12.90 | 12.90 | 0.00        | 5.96    | 5.88 | 0.08 | 8.18    | 8.13 | 0.04        | -3.60 | -3.65 | <b>0.05</b> |
| <b>U/Ψ35H3</b> | 13.38 | 12.82 | <b>0.56</b> | NA      | NA   | NA   | NA      | NA   | -           | -3.52 | -3.36 | <b>0.16</b> |
| <b>A36</b>     | NA    | NA    | NA          | -       | -    | -    | -       | -    | -           | -3.59 | -3.63 | <b>0.05</b> |
| <b>G37</b>     | 13.38 | 13.40 | 0.02        | 6.20    | 6.18 | 0.02 | 8.40    | 8.42 | 0.02        | -3.76 | -3.71 | <b>0.05</b> |
| <b>U38</b>     | 13.53 | 13.52 | 0.01        | NA      | NA   | NA   | NA      | NA   | NA          | -4.45 | -4.43 | 0.02        |
| <b>A39</b>     | NA    | NA    | NA          | 6.35    | 6.37 | 0.01 | 7.82    | 7.83 | 0.01        | -3.71 | -3.70 | 0.01        |
| <b>G40</b>     | 13.44 | 13.44 | 0.00        | 6.15    | 6.13 | 0.02 | 8.52    | 8.58 | <b>0.06</b> | -3.87 | -3.86 | 0.01        |
| <b>C41</b>     | NA    | NA    | NA          | 6.93    | 6.95 | 0.01 | 8.12    | 8.13 | 0.00        | -4.13 | -4.14 | 0.01        |
| <b>A42</b>     | NA    | NA    | NA          | -       | -    | -    | -       | -    | -           | -3.72 | -3.74 | 0.01        |
| <b>Ψ35H1</b>   |       | 10.33 |             |         |      |      |         |      |             |       |       |             |

**Table S3.** Effects of sequential NaCl (80 mM,  $\Psi$ +Na) and MgCl<sub>2</sub> (1.75 mM,  $\Psi$ +NaMg) additions on the chemical shifts of non-exchangeable protons in the pseudouridine-containing U2 snRNA – BPS duplex in 95% H<sub>2</sub>O/5% D<sub>2</sub>O (10 mM K<sub>2</sub>PO<sub>4</sub>, 0.25 mM EDTA pH 6.8). Chemical shift differences between  $\Psi$  and  $\Psi$ +NaMg are given and shown in bold if greater than 0.05 ppm.

(a) H6/H8, H5/H2, H1', H2' protons at 25°C.

| Residue                    | H6/H8        |            |        |       | H5/H2        |            |        |              | H1'          |            |        |       | H2'          |            |        |       |
|----------------------------|--------------|------------|--------|-------|--------------|------------|--------|--------------|--------------|------------|--------|-------|--------------|------------|--------|-------|
|                            | $\Psi$ +NaMg | $\Psi$ +Na | $\Psi$ | diff. | $\Psi$ +NaMg | $\Psi$ +Na | $\Psi$ | diff.        | $\Psi$ +NaMg | $\Psi$ +Na | $\Psi$ | diff. | $\Psi$ +NaMg | $\Psi$ +Na | $\Psi$ | diff. |
| <b>G1</b>                  | 8.14         | 8.14       | 8.14   | 0.002 | NA           | NA         | NA     | NA           | 5.89         | 5.89       | 5.89   | 0.000 | 4.81         | 4.81       | 4.82   | 0.012 |
| <b>C2</b>                  | 7.86         | 7.84       | 7.83   | 0.033 | 5.25         | 5.26       | 5.27   | 0.013        | 5.58         | 5.58       | 5.58   | 0.002 | 4.44         | 4.45       | 4.46   | 0.014 |
| <b>U3</b>                  | 7.91         | 7.90       | 7.89   | 0.027 | 5.51         | 5.51       | 5.51   | 0.001        | 5.53         | 5.53       | 5.53   | 0.002 | 4.59         | 4.59       | 4.60   | 0.013 |
| <b>A4</b>                  | 8.18         | 8.17       | 8.17   | 0.007 | 7.05         | 7.06       | 7.06   | 0.010        | 5.98         | 5.98       | 5.98   | 0.003 | 4.55         | 4.56       | 4.57   | 0.016 |
| <b>C5</b>                  | 7.46         | 7.44       | 7.42   | 0.036 | 5.26         | 5.26       | 5.25   | 0.002        | 5.28         | 5.28       | 5.27   | 0.010 | 4.04         | 4.03       | 4.04   | 0.002 |
| <b>U6</b>                  | 7.66         | 7.64       | 7.64   | 0.028 | 5.32         | 5.31       | 5.31   | 0.015        | 5.81         | 5.80       | 5.79   | 0.014 | 4.29         | 4.29       | 4.28   | 0.012 |
| <b>G7</b>                  | 7.95         | 7.94       | 7.93   | 0.019 | NA           | NA         | NA     | NA           | 5.91         | 5.91       | 5.90   | 0.016 | 4.78         | 4.77       | 4.75   | 0.031 |
| <b>A8</b>                  | 8.32         | 8.33       | 8.34   | 0.025 | 7.57         | 7.60       | 7.62   | <b>0.047</b> | 6.03         | 6.03       | 6.03   | 0.004 | 4.71         | 4.71       | 4.72   | 0.005 |
| <b>C9</b>                  | 7.48         | 7.48       | 7.47   | 0.004 | 5.05         | 5.07       | 5.09   | 0.031        | 5.48         | 5.49       | 5.49   | 0.011 | 4.38         | 4.38       | 4.38   | 0.003 |
| <b>G10</b>                 | 7.47         | 7.47       | 7.48   | 0.011 | NA           | NA         | NA     | NA           | 5.70         | 5.70       | 5.70   | 0.000 | 4.48         | 4.48       | 4.49   | 0.005 |
| <b>A11</b>                 | 7.86         | 7.86       | 7.87   | 0.010 | 7.86         | 7.86       | 7.86   | 0.005        | 5.96         | 5.96       | 5.97   | 0.006 | 4.12         | 4.12       | 4.13   | 0.019 |
| <b>C33</b>                 | 8.10         | 8.09       | 8.09   | 0.002 | 5.99         | 5.99       | 5.99   | 0.000        | 5.64         | 5.63       | 5.64   | 0.002 | 4.69         | 4.69       | 4.69   | 0.000 |
| <b>G34</b>                 | 7.73         | 7.72       | 7.72   | 0.015 | NA           | NA         | NA     | NA           | 5.78         | 5.78       | 5.78   | 0.003 | 4.74         | 4.74       | 4.75   | 0.005 |
| <b><math>\Psi</math>35</b> | 7.01         | 7.00       | 7.01   | 0.009 | NA           | NA         | NA     | NA           | 4.66         | 4.65       | 4.65   | 0.007 | 4.43         | 4.43       | 4.42   | 0.012 |
| <b>A36</b>                 | 8.12         | 8.13       | 8.14   | 0.019 | 6.92         | 6.95       | 6.97   | <b>0.055</b> | 5.85         | 5.86       | 5.87   | 0.018 | 4.69         | 4.71       | 4.72   | 0.032 |
| <b>G37</b>                 | 7.17         | 7.14       | 7.13   | 0.048 | NA           | NA         | NA     | NA           | 5.39         | 5.37       | 5.37   | 0.028 | 4.28         | 4.30       | 4.31   | 0.027 |
| <b>U38</b>                 | 7.68         | 7.66       | 7.65   | 0.023 | 5.07         | 5.06       | 5.06   | NA           | 5.47         | 5.48       | 5.48   | 0.011 | 4.45         | 4.46       | 4.47   | 0.019 |
| <b>A39</b>                 | 8.06         | 8.07       | 8.07   | 0.012 | 6.80         | 6.79       | 6.79   | 0.003        | 5.99         | 5.99       | 5.99   | 0.001 | 4.60         | 4.62       | 4.63   | 0.025 |
| <b>G40</b>                 | 7.28         | 7.29       | 7.29   | 0.009 | NA           | NA         | NA     | NA           | 5.58         | 5.58       | 5.59   | 0.007 | 4.37         | 4.38       | 4.39   | 0.013 |
| <b>C41</b>                 | 7.35         | 7.35       | 7.36   | 0.012 | 5.10         | 5.09       | 5.09   | 0.001        | 5.42         | 5.42       | 5.43   | 0.010 | 4.35         | 4.36       | 4.36   | 0.004 |
| <b>A42</b>                 | 8.03         | 8.03       | 8.03   | 0.004 | 7.46         | 7.46       | 7.46   | 0.002        | 6.00         | 6.01       | 6.01   | 0.002 | 4.05         | 4.06       | 4.06   | 0.006 |

**Table S3 (continued).**  
**(b) H1/H3 protons at 0 °C.**

| Residue     | $\Psi_{+NaMg}$ | $\Psi_{+Na}$ | H1/H3  | diff.        |
|-------------|----------------|--------------|--------|--------------|
|             |                |              | $\Psi$ |              |
| G1          | 12.72          | 12.72        | 12.72  | 0.000        |
| C2          | NA             | NA           | NA     | NA           |
| U3          | 13.34          | 13.34        | 13.31  | 0.030        |
| A4          | NA             | NA           | NA     | NA           |
| C5          | NA             | NA           | NA     | NA           |
| U6          | 13.48          | 13.51        | 13.58  | <b>0.100</b> |
| G7          | -              | -            | 10.70  | NA           |
| A8          | NA             | NA           | NA     | NA           |
| C9          | NA             | NA           | NA     | NA           |
| G10         | 12.34          | 12.35        | 12.34  | 0.000        |
| A11         | NA             | NA           | NA     | NA           |
| C33         | NA             | NA           | NA     | NA           |
| G34         | 12.94          | 12.94        | 12.93  | 0.010        |
| $\Psi$ 35H3 | 12.88          | 12.87        | 12.84  | 0.040        |
| A36         | NA             | NA           | NA     | NA           |
| G37         | 13.45          | 13.42        | 13.41  | 0.040        |
| U38         | 13.56          | 13.55        | 13.54  | 0.020        |
| A39         | NA             | NA           | NA     | NA           |
| G40         | 13.49          | 13.47        | 13.46  | 0.030        |
| C41         | NA             | NA           | NA     | NA           |
| A42         | NA             | NA           | NA     | NA           |
| $\Psi$ 35H1 | 10.31          | 10.29        | 10.33  | 0.020        |

**Table S4.** Effect of NaCl (80 mM, U+Na) and then MgCl<sub>2</sub> (1.75 mM, U+NaMg) on chemical shifts of non-exchangeable protons of **unmodified** U2 snRNA – BPS duplex in 95% H<sub>2</sub>O/5% D<sub>2</sub>O (10 mM K<sub>2</sub>PO<sub>4</sub>, 0.25 mM EDTA pH 6.8). Chemical shift differences between U and U+NaMg are given and shown in bold if greater than 0.05 ppm.

(a) H6/H8, H5/H2, H1', H2' protons at 25°C.

| Residue    | H6/H8  |      |      |       | H5/H2  |      |       |              | H1'    |      |      |       | H2'    |      |      |              |
|------------|--------|------|------|-------|--------|------|-------|--------------|--------|------|------|-------|--------|------|------|--------------|
|            | U+NaMg | U+Na | U    | diff. | U+NaMg | U+Na | U     | diff.        | U+NaMg | U+Na | U    | diff. | U+NaMg | U+Na | U    | diff.        |
| <b>G1</b>  | 8.15   | 8.14 | 8.15 | 0.000 | NA     | NA   | NA    | NA           | 5.90   | 5.90 | 5.90 | 0.001 | 4.81   | 4.81 | 4.83 | 0.023        |
| <b>C2</b>  | 7.87   | 7.86 | 7.83 | 0.044 | 5.26   | 5.26 | 5.28  | 0.019        | 5.58   | 5.58 | 5.59 | 0.002 | 4.44   | 4.45 | 4.46 | 0.022        |
| <b>U3</b>  | 7.92   | 7.91 | 7.89 | 0.038 | 5.51   | 5.51 | 5.52  | 0.007        | 5.53   | 5.53 | 5.53 | 0.007 | 4.59   | 4.60 | 4.61 | 0.022        |
| <b>A4</b>  | 8.18   | 8.17 | 8.17 | 0.009 | 7.05   | 7.05 | 7.06  | 0.014        | 5.98   | 5.98 | 5.98 | 0.002 | 4.55   | 4.56 | 4.57 | 0.026        |
| <b>C5</b>  | 7.46   | 7.44 | 7.41 | 0.047 | 5.24   | 5.24 | 5.24  | 0.001        | 5.29   | 5.28 | 5.28 | 0.009 | 4.04   | 4.04 | 4.06 | 0.021        |
| <b>U6</b>  | 7.67   | 7.65 | 7.64 | 0.029 | 5.33   | 5.32 | 5.32  | 0.010        | 5.79   | 5.78 | 5.76 | 0.029 | 4.30   | 4.29 | 4.29 | 0.011        |
| <b>G7</b>  | 7.93   | 7.91 | 7.89 | 0.037 | NA     | NA   | NA    | NA           | 5.87   | 5.85 | 5.83 | 0.042 | 4.74   | 4.71 | 4.68 | <b>0.063</b> |
| <b>A8</b>  | 8.28   | 8.29 | 8.29 | 0.018 | 7.54   | 7.59 | 7.65  | <b>0.109</b> | 5.98   | 5.97 | 5.97 | 0.005 | 4.68   | 4.68 | 4.69 | 0.012        |
| <b>C9</b>  | 7.48   | 7.47 | 7.47 | 0.006 | 5.12   | 5.14 | 5.16  | 0.043        | 5.49   | 5.49 | 5.51 | 0.022 | 4.38   | 4.38 | 4.38 | 0.003        |
| <b>G10</b> | 7.47   | 7.48 | 7.51 | 0.031 | NA     | NA   | NA    | NA           | 5.69   | 5.69 | 5.70 | 0.010 | 4.49   | 4.49 | 4.51 | 0.018        |
| <b>A11</b> | 7.86   | 7.87 | 7.90 | 0.033 | 7.87   | 7.87 | 7.89  | 0.020        | 5.97   | 5.97 | 5.98 | 0.013 | 4.13   | 4.14 | 4.17 | 0.039        |
| <b>C33</b> | 8.08   | 8.08 | 8.07 | 0.012 | 6.00   | 6.00 | 5.99  | 0.011        | 5.65   | 5.65 | 5.66 | 0.012 | 4.68   | 4.67 | 4.67 | 0.008        |
| <b>G34</b> | 7.68   | 7.67 | 7.67 | 0.009 | NA     | NA   | NA    | NA           | 5.76   | 5.76 | 5.76 | 0.001 | 4.58   | 4.58 | 4.59 | 0.015        |
| <b>U35</b> | 7.57   | 7.56 | 7.56 | 0.015 | 5.20   | 5.21 | 5.235 | 0.031        | 5.51   | 5.51 | 5.53 | 0.021 | 4.50   | 4.49 | 4.48 | 0.022        |
| <b>A36</b> | 8.20   | 8.20 | 8.23 | 0.030 | 6.97   | 7.01 | 7.06  | <b>0.088</b> | 5.88   | 5.89 | 5.90 | 0.023 | 4.71   | 4.73 | 4.75 | 0.046        |
| <b>G37</b> | 7.21   | 7.18 | 7.17 | 0.042 | NA     | NA   | NA    | NA           | 5.38   | 5.35 | 5.35 | 0.022 | 4.28   | 4.29 | 4.32 | 0.047        |
| <b>U38</b> | 7.69   | 7.68 | 7.66 | 0.028 | 5.08   | 5.07 | 5.07  | NA           | 5.47   | 5.48 | 5.49 | 0.018 | 4.44   | 4.45 | 4.46 | 0.025        |
| <b>A39</b> | 8.06   | 8.07 | 8.08 | 0.021 | 6.80   | 6.80 | 6.80  | 0.001        | 5.99   | 5.99 | 5.99 | 0.002 | 4.59   | 4.61 | 4.63 | 0.040        |
| <b>G40</b> | 7.29   | 7.29 | 7.30 | 0.016 | NA     | NA   | NA    | NA           | 5.58   | 5.59 | 5.59 | 0.012 | 4.37   | 4.38 | 4.39 | 0.019        |
| <b>C41</b> | 7.35   | 7.35 | 7.37 | 0.020 | 5.10   | 5.10 | 5.10  | 0.002        | 5.42   | 5.42 | 5.44 | 0.017 | 4.35   | 4.36 | 4.36 | 0.011        |
| <b>A42</b> | 8.03   | 8.03 | 8.04 | 0.011 | 7.46   | 7.47 | 7.47  | 0.010        | 6.01   | 6.01 | 6.01 | 0.008 | 4.06   | 4.06 | 4.07 | 0.010        |

(b) H1/H3 protons at 0 °C.

| Residue      | U+NaMg | U+Na  | H1/H3 |              |
|--------------|--------|-------|-------|--------------|
|              |        |       | U     | diff.        |
| <b>G1</b>    | 12.72  | 12.72 | 12.71 | 0.010        |
| <b>C2</b>    | NA     | NA    | NA    | NA           |
| <b>U3</b>    | 13.34  | 13.33 | 13.29 | <b>0.050</b> |
| <b>A4</b>    | NA     | NA    | NA    | NA           |
| <b>C5</b>    | NA     | NA    | NA    | NA           |
| <b>U6</b>    | 13.28  | 13.29 | 13.33 | <b>0.050</b> |
| <b>G7</b>    | -      | -     | 10.49 | NA           |
| <b>A8</b>    | NA     | NA    | NA    | NA           |
| <b>C9</b>    | NA     | NA    | NA    | NA           |
| <b>G10</b>   | 12.37  | 12.37 | 12.35 | 0.020        |
| <b>A11</b>   | NA     | NA    | NA    | NA           |
| <b>C33</b>   | NA     | NA    | NA    | NA           |
| <b>G34</b>   | 12.93  | 12.93 | 12.9  | 0.030        |
| <b>U35H3</b> | 13.4   | 13.36 | 13.38 | 0.020        |
| <b>A36</b>   | NA     | NA    | NA    | NA           |
| <b>G37</b>   | 13.44  | 13.41 | 13.38 | <b>0.060</b> |
| <b>U38</b>   | 13.56  | 13.56 | 13.53 | 0.030        |
| <b>A39</b>   | NA     | NA    | NA    | NA           |
| <b>G40</b>   | 13.5   | 13.48 | 13.44 | <b>0.060</b> |
| <b>C41</b>   | NA     | NA    | NA    | NA           |
| <b>A42</b>   | NA     | NA    | NA    | NA           |



**Fig. S1.** 2D NOESY spectrum of pseudouridine-containing duplex in 95/5% H<sub>2</sub>O/D<sub>2</sub>O at 0 °C with 200 ms mixing time. Cross-peaks from imino protons to intra-strand and cross-strand H1' protons are labeled. The G7 imino proton only exhibits cross-peaks to water and a very broad cross-peak near 6.1 ppm, which probably results from the G7 amino protons. The Watson-Crick pair peak assignments (blue box) are shown in Fig. 1.

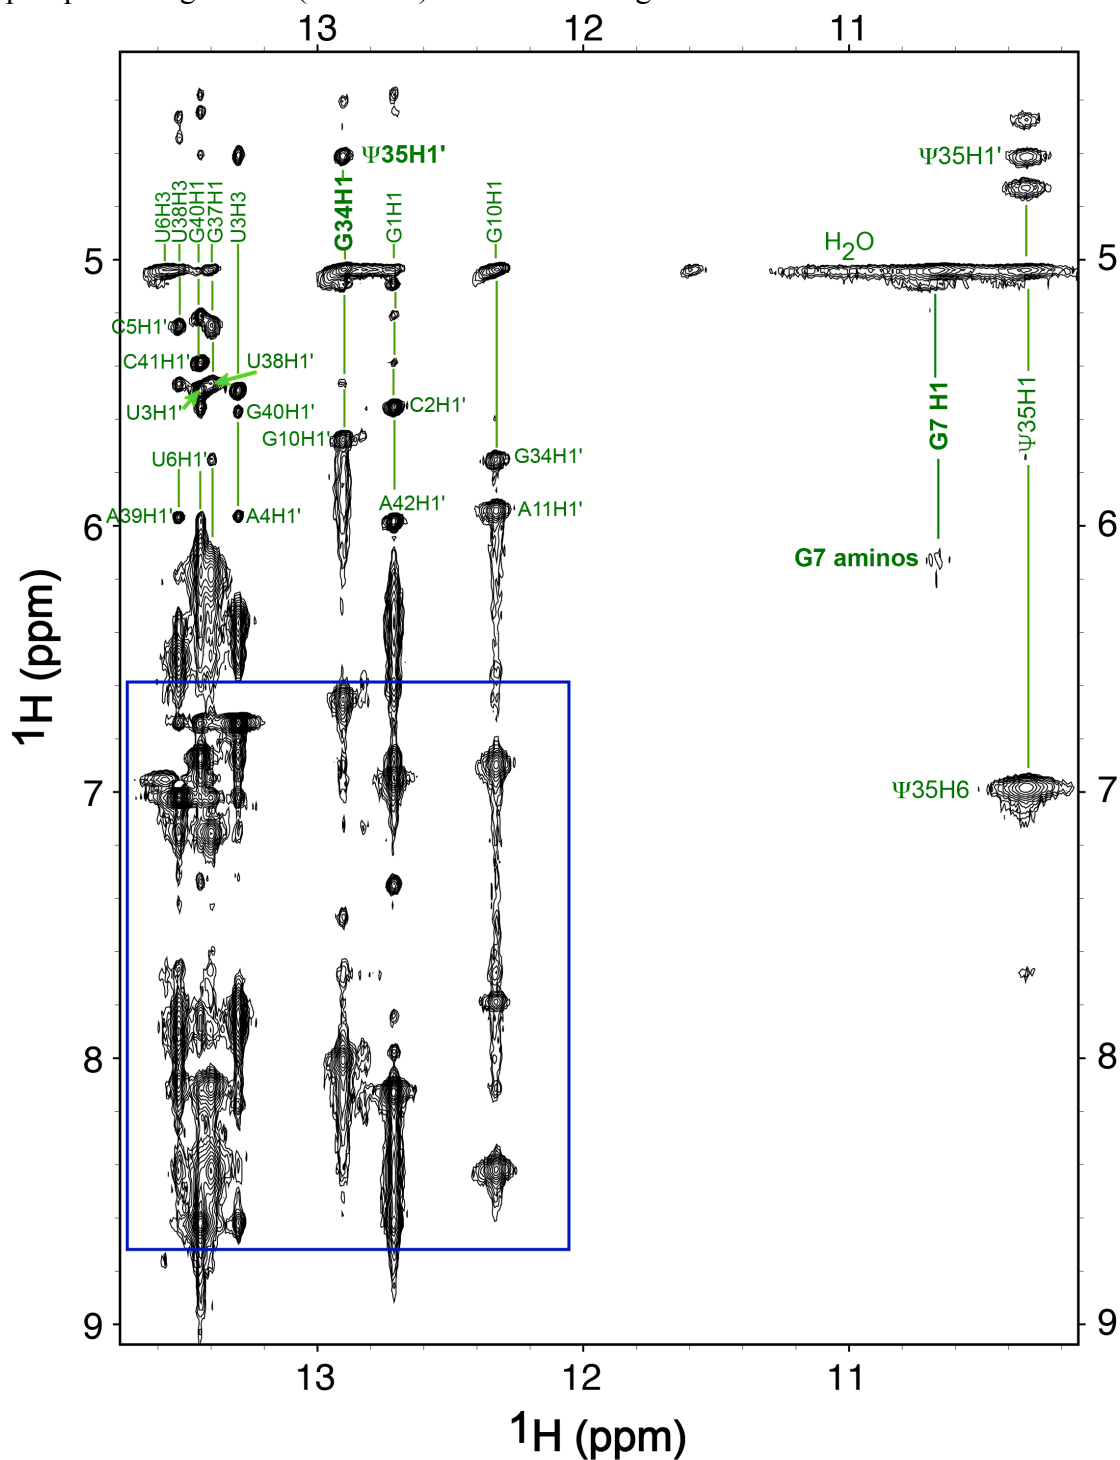

**Fig. S2.** Imino proton region of 1D slices taken from 2D NOESY spectra at the chemical shift of water protons at 0 °C in phosphate buffer. (a) pseudouridine-containing and (b) unmodified duplexes. Relative peak intensities reflect fraction of indicated imino protons that exchanged with water protons during NOESY mix time: (a) 50 msec, (b) 200 msec. Hydrogen-bonded protons that are not solvent-exposed have the lowest peak intensity.

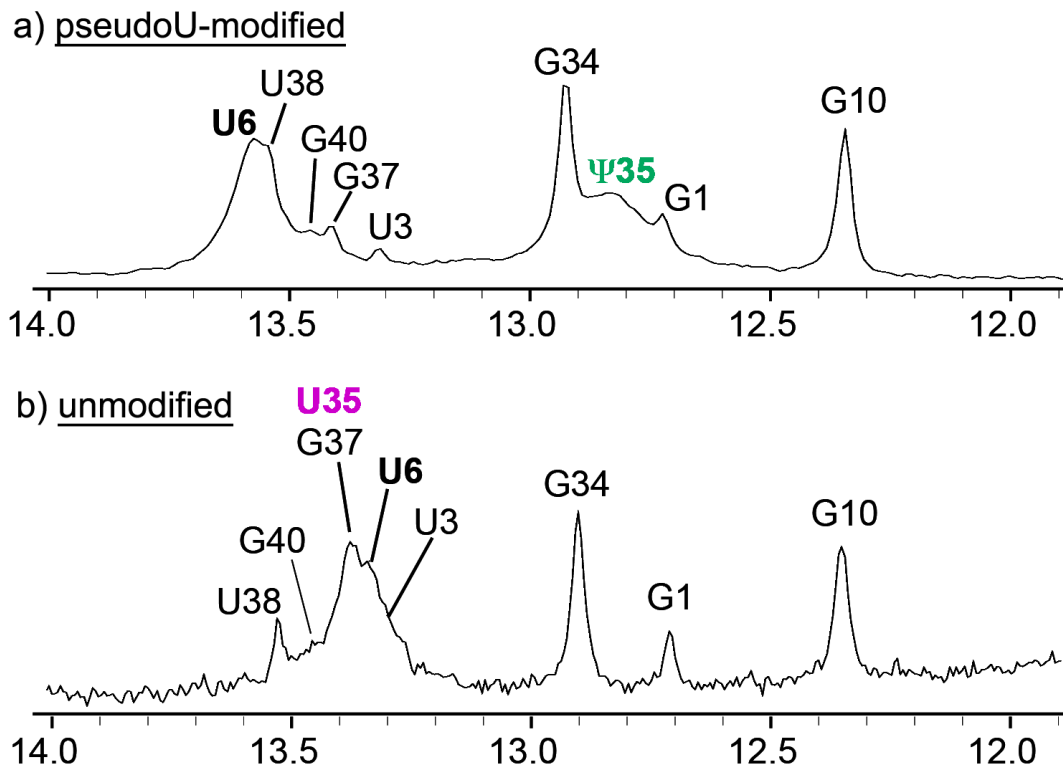

**Fig. S3.** 1D NMR spectra of the imino region of pseudouridine-modified (left) and unmodified (right) U2 snRNA – BPS duplexes at 0 °C in the indicated buffer conditions.

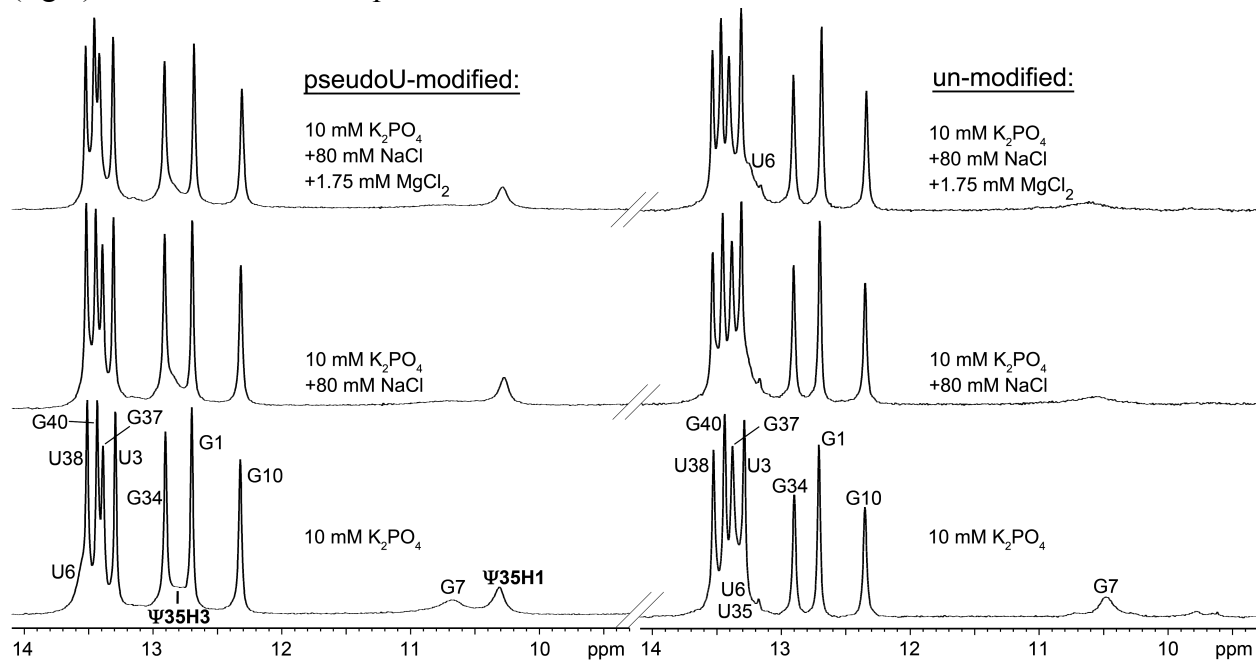

**Fig. S4.** 2D NMR spectra of the imino-aromatic/amino region of pseudouridine-modified U2 snRNA – BPS duplex at 0 °C in either (a) 10 mM  $K_2PO_4$  or (b) 10 mM  $K_2PO_4$  pH 6.8, 80 mM NaCl, and  $MgCl_2$  added in a 1:1 molar ratio with the RNA strands. Contours in the boxed region (green) are drawn five-fold lower than in the rest of the spectrum to show  $\Psi35-A8$ .

pseudoU-modified:

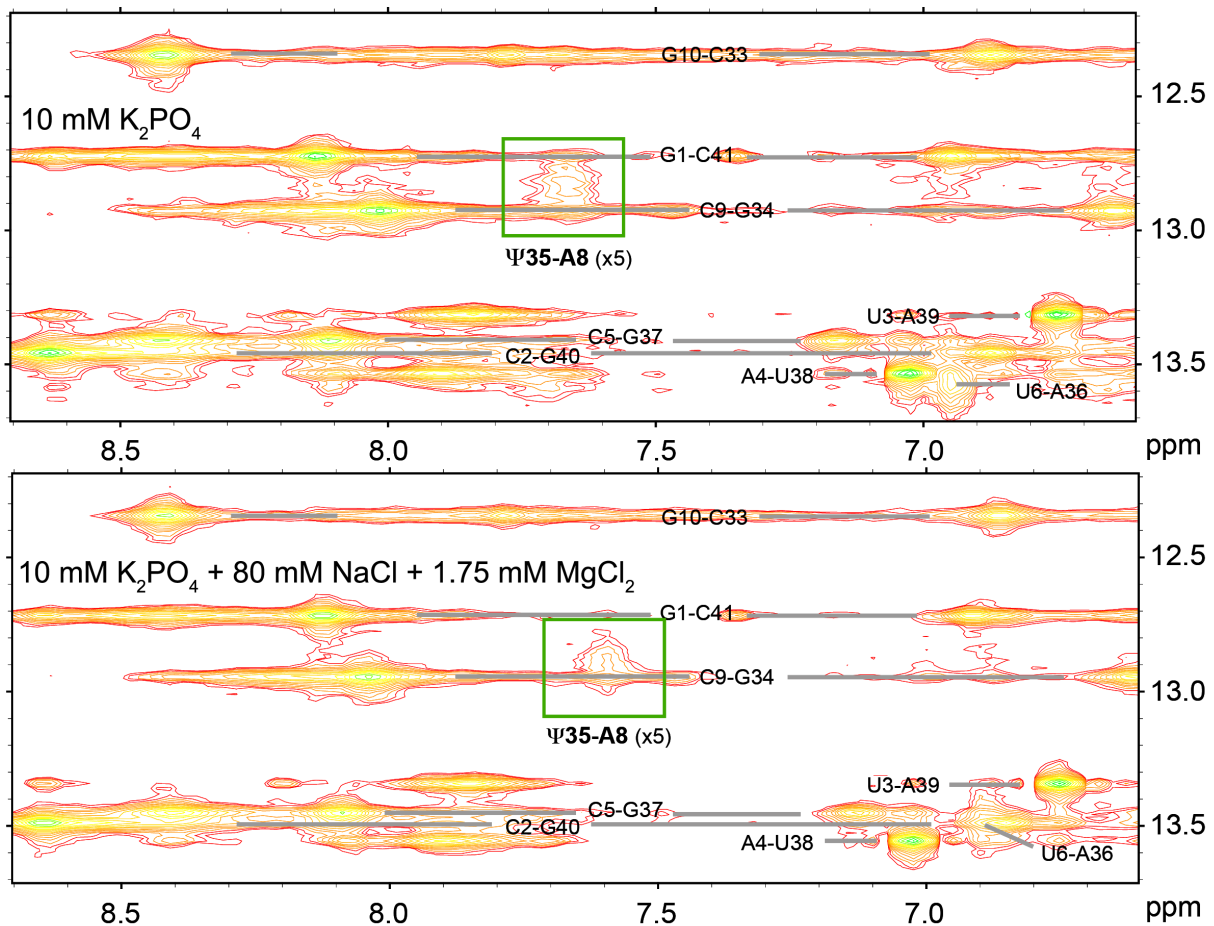

**Fig. S5.** Effect of NaCl and MgCl<sub>2</sub> on representative NMR spectra of the pseudouridine-modified and unmodified RNA duplexes. (a) NOESY cross-peak volumes from the branch site region of the pseudouridine-modified (green) and unmodified (purple) U2 snRNA/BPS-containing duplexes in either phosphate buffer (dark) or higher ionic strength buffer with NaCl and MgCl<sub>2</sub> added (light). The average and standard deviation of the H1' – H6/H8 and H2'–(n+1)H8/6 NOE volumes of the base paired stem regions are given for comparison. (b)-(c) Proton shift correlations in low salt *versus* higher ionic strength buffer of branch site nucleotides U6-C9 (filled, red) and other nucleotides 1-5, 10-11, 33, 37-42 (hollow) for (b) pseudouridine-modified or (c) unmodified RNA duplexes. Shifts of H6/H8/H2. The H5/H1', and H2'/H3'/H4' protons are expressed relative to 7.5, 5.5, and 4.5 ppm, respectively. See Table S3 for assigned chemical shifts. Both samples were in 95% H<sub>2</sub>O/5% D<sub>2</sub>O.

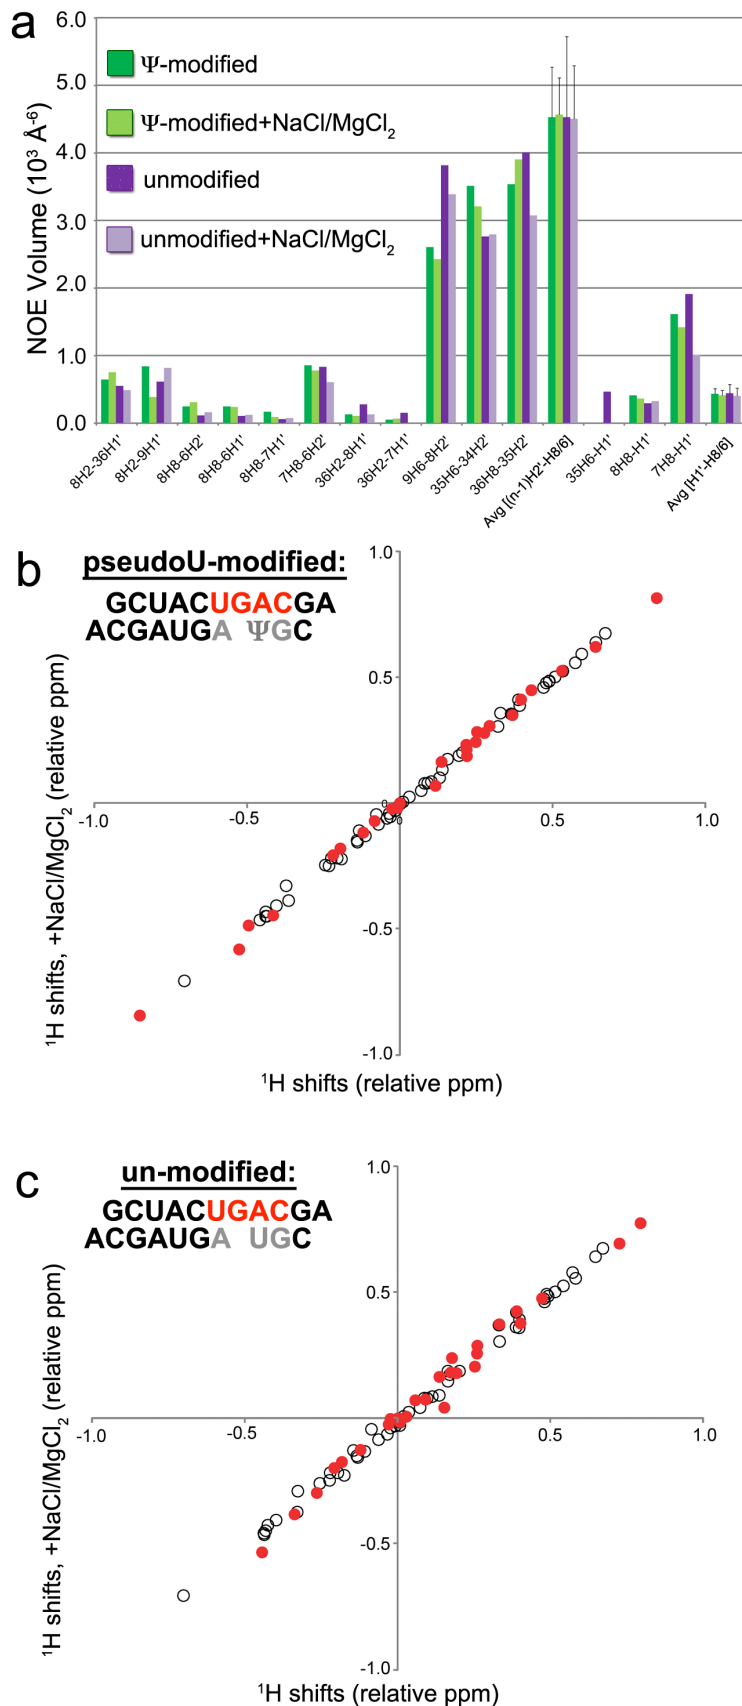

Supplement: NIHMS1522252-supplement-2.pdf [file NIHMS1522252-supplement-2.pdf]
